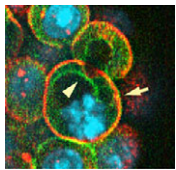

### A fateful look at early mouse lineage specification

The first cell lineages specified in the mouse embryo are the trophoblast (TE), which generates the embryonic portion of the placenta, and the inner cell mass (ICM). The ICM subsequently forms the pluripotent epiblast (EPI, which produces the embryo) and the primitive endoderm (PrE, which generates other extra-embryonic structures). Two papers shed new light on these crucially important early embryonic specification events.

On p. 3383, Janet Rossant and colleagues investigate the role that the intercellular adhesion molecule E-cadherin plays in the divergence of the TE and ICM. By embryonic day 3.5, the TE has formed a polarised epithelial layer that encloses the apolar ICM. The researchers show that the normal epithelial morphology of the TE is disrupted in mouse embryos lacking both maternal and zygotic E-cadherin function but that individual cells in the blastocyst still initiate TE- and ICM-like fates. Interestingly, most of the cells express the TE marker *Cdx2*, which suggests that organised epithelium formation is not necessary for TE-specific gene expression. Furthermore, individual cells in these embryos still generate an apical membrane domain that correlates with *Cdx2* expression. Thus, the epithelial integrity mediated by E-cadherin is not required for *Cdx2* expression but is essential for setting normal TE/ICM ratios in mouse embryos.

On p. 3361, Anna-Katerina Hadjantonakis and colleagues identify a role for platelet-derived growth factor (PDGF) signalling in PrE expansion in mouse embryos. The PDGF receptor  $\alpha$  (PDGFR $\alpha$ ) is an early marker of the PrE lineage and of extra-embryonic endoderm (XEN) cells, which can be isolated from mouse blastocysts as derivatives of the PrE lineage. By combining live imaging and lineage analysis, the researchers show that *Pdgfra* expression coincides with that of GATA6, the earliest expressed transcription factor in the PrE lineage. GATA6 expression, they report, is required for *Pdgfra* transcriptional activation, and PDGF signalling is essential for the establishment and proliferation of XEN cells in culture. Moreover, implantation-delayed *Pdgfra*-null mutant blastocysts contain reduced PrE cell numbers and, surprisingly, increased EPI cell numbers, indicating that reciprocal signalling between PrE and EPI tissues might regulate compartment size within peri-implantation mammalian embryos. For more on early mouse lineage segregation, see also the review by Lanner and Rossant on p. 3351.

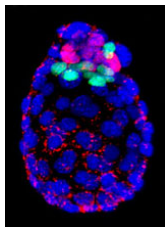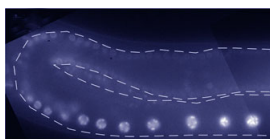

### OMA-1/2: repressors of translation and transcription

Primordial germ cell specification requires global transcriptional repression. In *C. elegans*, the zygote (P0) undergoes four successive asymmetric divisions to generate the germline precursors P1, P2, P3 and finally P4, the germline founder. OMA-1 and OMA-2 (OMA1/2), cytoplasmic proteins degraded after the first mitotic cycle, repress global transcription in P0 and P1 by sequestering TAF-4, an RNA polymerase II pre-initiation complex component, while the maternal protein PIE-1 represses transcript elongation in P2-P4. Now, Rueyling Lin and colleagues report that OMA proteins repress transcription in P2-P4 indirectly by maintaining PIE-1 expression (see p. 3373). OMA-1/2, they show, repress *zif-1* mRNA translation in oocytes; *zif-1* encodes the substrate-binding subunit of the E3 ligase that marks PIE-1 for degradation. MBK-2, a kinase that is activated after fertilisation, controls OMA1/2 function, report the researchers. Thus, they suggest, MBK-2 phosphorylation of OMA1/2 acts as a key developmental switch in the oocyte-to-embryo transition by converting OMA proteins from specific translational repressors in oocytes to global transcriptional repressors in embryos.

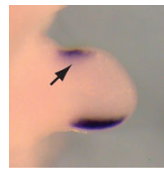

### Shh: new TWISTs to limb patterning

Sonic hedgehog (SHH) controls anterior-posterior (A-P) patterning in the mammalian limb. Its expression is normally restricted to the posterior limb bud but when expressed ectopically, it can change digit number and/or identity. Several transcriptional factors regulate *Shh* expression in the limb bud but how do they function together? On p. 3417, Xin Sun and co-workers report that interactions between two negative regulators of *Shh* expression (the ETS transcription factors ETV4/5 and the bHLH transcription factor TWIST1) and a positive regulator of *Shh* expression (the bHLH transcription factor HAND2) control A-P limb patterning in mice. By examining mutant limb buds, the researchers show that *Twist1* is required to inhibit *Shh* expression in the anterior limb bud, and that it acts with the *Etv* genes to antagonise *Hand2*. Moreover, biochemical data indicate that the ETV proteins inhibit *Shh* expression by regulating the dimerisation of TWIST1/HAND2. Together, these findings highlight the importance of a precise balance between positive and negative regulators of *Shh* expression during limb A-P patterning.

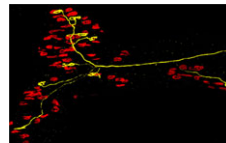

### Muscling in on motoneuron specification

Mammalian skeletal muscles contain several types of muscle fibres, each characterised by its contraction speed and molecular properties. Individual motor axons innervate a few dozen muscle fibres, usually all of the same type. How this striking 'motor unit homogeneity' is established is incompletely understood but, on p. 3489, Joshua Sanes and colleagues reveal that, in mice, signals from the muscle fibres influence the molecular properties of motoneurons that innervate them. The lack of markers for motoneuron types has impeded the study of motor unit homogeneity. Here, however, the researchers show that the motoneurons that innervate slow muscle fibres selectively express the synaptic vesicle protein SV2A and carry it to their nerve terminals. Notably, overexpression of the transcriptional co-regulator PGC1 $\alpha$  in muscle fibres, which converts them to a slow phenotype, increases the number of SV2A-positive motoneurons. The researchers propose, therefore, that retrograde signals from muscles integrate with previously described anterograde influences of the nerve on the muscle fibre to match the properties of these synaptic partners to each other.

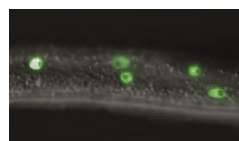

### LIN-42-ing up development and stress

Environmental stresses, such as nutrient fluctuations, can affect developmental progression in animals. *C. elegans* larvae, for example, normally develop into adults through four larval stages under the control of heterochronic (developmental timing) genes such as *lin-42*, a homologue of the circadian rhythm gene *period*. But, when times are hard, *C. elegans* forms long-lived dauer larvae, an alternative third larval stage. Now, Ann Rougvie and co-workers report that *lin-42* functions in dauer entry (see p. 3501). Loss of *lin-42*, they report, makes animals hypersensitive to dauer formation under stressful conditions, whereas misexpression of *lin-42* in pre-dauer stages inhibits dauer formation. Other experiments suggest that LIN-42 acts in opposition to the ligand-free form of the nuclear receptor DAF-12, which integrates external cues and developmental decisions. Together, these results suggest that LIN-42 and DAF-12 are intimate partners in the decision to become a dauer larva and raise the possibility that Period-like proteins play a conserved role in coordinating intrinsic timing mechanisms with environmental conditions.

Jane Bradbury
